# Supplementary material
Source: publisher site journal article supplement (https://www.dovepress.com/article/254117)
Supplement: Supplementary file 1 [file get_supplementary_file.php]

Figure S1 c-Met gene expression in tumor specimens and cell lines.

Notes: (A) c-Met-positive reactivity with cancer specimens by immunohistochemistry, including 3 lung adenocarcinoma, 2 lung squamous cell carcinoma, and 4 ovarian cancer (one representative shown in Figure 1A for each group). Adjacent tissues are stained as control. Bar:100 $\mu$ m; (B) c-Met binding to A549, SKOV3, HepG2 and MDA-MB-468 cells was detected by immunofluorescence staining. Red stained for c-Met, Blue for DAPI. Bar:20 $\mu$ m; (C) c-Met binding to A549 and SKOV3 cells with BS001 and monovalent antibody, and CD3 binding to CD3<sup>+</sup>CD4<sup>+</sup>T and CD3<sup>+</sup>CD8<sup>+</sup>T with BS001 by FACS; (D) PBMC and CD3-depleted PBMC killing activity on A549 and SKOV3 mediated by BS001 at doses of 0.0001–10  $\mu$ g/mL was analyzed by LDH detection. The results were shown as mean  $\pm$  SEM; (E) Flow cytometry analyses of c-Met binding to hepa1-6 and mc38 cells with BS001; (F) PBMC killing activity on 293T cells (E:T=10:1) mediated by BS001 and the monovalent c-Met antibody. The results were shown as mean  $\pm$  SEM; (G) A549 cells were treated with the indicated concentrations of BS001 or the monovalent c-Met antibody for 8 h, and then stimulated with HGF (100 ng/mL) for 30 min. Total cell lysates were evaluated by Western blotting using indicated antibodies. GAPDH expression was used as an internal control.

Abbreviations: DAPI, 4',6-diamidino-2-phenylindole; PBMC, peripheral blood mononuclear cell; LDH, lactate dehydrogenase; HGF, hepatocyte growth factor.

# 1A

| Tumor Patients | Lung adenocarcinoma(LUAD) | Lung squamous cell carcinoma (LUSC) | Ovarian cancer (OV) |
|----------------|---------------------------|-------------------------------------|---------------------|
| Negative (<5%) |                           |                                     |                     |
| + (5-25%)      | 2                         | 1                                   | 1                   |
| ++ (25-50%)    | 1                         | 1                                   | 1                   |
| +++ (>50%)     |                           |                                     | 2                   |
| Total          | 3                         | 2                                   | 4                   |

c-Met positive tissues at 1–3+ scores



# 1B

c-Met high expressed cell lines

c-Met low



**1C****1D****1E****1F****1G**

|                           |     |   |     |     |     |     |
|---------------------------|-----|---|-----|-----|-----|-----|
| HGF (100ng/mL)            | -   | + | +   | +   | +   | +   |
| monovalent c-Met antibody | 0.5 | - | 0.5 | -   | 1.0 | -   |
| BS001 (µM)                | -   | - | -   | 0.5 | -   | 1.0 |



Figure S2 BS001-mediated T-cell engagement and killing of tumor cells.

Notes: (A) FACS analyses for the PBMC before the addition to the attached tumor cells as 'initial lymphocytes'; (B) Percentages of suspended CD3<sup>+</sup>T and CD8<sup>+</sup>T cells in the supernatants after co-culture at doses of 0.01–10 $\mu$ g/mL BS001 were determined by FACS. The percentages subtracted to the initial percentage represent the attached T cells ratio shown in Figure 3C; (C) Purity verifications of microbeads-isolated subtype T cells from donor PBMC were performed by FACS. Purity: >99% for CD3<sup>+</sup>T and >90% for CD3<sup>+</sup>CD8<sup>+</sup>T.

Abbreviations: FACS, fluorescence activated cell sorting; PBMC, peripheral blood mononuclear cell.

**2A**

Lymphocyte 47.7%  
 CD3+ 64.5%  
 CD8+/CD3+ 52.7%

**2B**

A549:PBMC supernatant ratio



SKOV3:PBMC supernatant ratio

**2C**

Figure S3 BS001 inhibits tumor growth in xenograft models.

Notes: (A) Among dissected A549 tumors, CD3<sup>+</sup>CD8<sup>+</sup>T cells were detected in the 0, 4 and 10 mg/kg BS001 groups by FACS; (B,C,D) CD56-positive cells in infiltrating CD3<sup>+</sup>, CD25<sup>+</sup>, and CD8<sup>+</sup>T cells in the above groups were detected; the results were shown individually.(E) AST/ALT levels in serum from all groups on indicated days were detected by kit. The results were shown as mean  $\pm$  SEM. n.s represent no significant difference;

Abbreviations: FACS, fluorescence activated cell sorting; AST, aspartate transaminase; ALT, alanine transaminase.

**3A****3B****3C****3D**

| Vehicle | 1 | 2 | 3 |
|---------|---|---|---|
| 4mg/kg  | 1 | 2 | 3 |
| 10mg/kg | 1 | 2 |   |

**3E**
